# Supplementary material for: Identification of IMC43, a novel IMC protein that collaborates with IMC32 to form an essential daughter bud assembly complex in Toxoplasma gondii
Source: PubMed Central journal article supplement (PMC10569561; doi:10.1371/journal.ppat.1011707), 2023-10-02
Supplement: ppat.1011707.s013.pdf [file ppat.1011707.s013.pdf]

Dear Prof Bradley,

Thank you very much for submitting your manuscript "Identification of IMC43, a novel IMC protein that collaborates with IMC32 to form an essential daughter bud initiation complex in *Toxoplasma gondii*" for consideration at PLOS Pathogens. As with all papers reviewed by the journal, your manuscript was reviewed by members of the editorial board and by several independent reviewers. The reviewers appreciated the attention to an important topic. Based on the reviews, we are likely to accept this manuscript for publication, providing that you modify the manuscript according to the review recommendations.

I am returning your manuscript with three reviews. The reviewers were very positive about the quality and impact of the work of the manuscript. There are some minor aspects that I would like to you to address to prepare the manuscript for publication. No new experiments are required.

In particular, I'd like you to consider reviewer 2's points:

1. Re: the title of your manuscript. Please revise the title or provide justification as to why you think it should not be.
2. Please justify why you used the time point of 24hrs of IAA treatment given the fast knockdown and consider including this justification into the manuscript.
3. You are not required to perform additional IFAs looking at the location of the suture proteins, ISC and TSCs, unless you would like to.
4. No super resolution or additional experimentation to dissect out localisation of IMC43 truncation mutants are required.

Please also address point-by-point all other queries and modify the text of the manuscript accordingly.

If all the following items are addressed, I hope to be able to make a final decision without sending the manuscript out for a second round of review.

Please prepare and submit your revised manuscript within 30 days. If you anticipate any delay, please let us know the expected resubmission date by replying to this email.

When you are ready to resubmit, please upload the following:

[1] A letter containing a detailed list of your responses to all review comments, and a description of the changes you have made in the manuscript.

Please note while forming your response, if your article is accepted, you may have the opportunity to make the peer review history publicly available. The record will include editor decision letters (with reviews) and your responses to reviewer comments. If eligible, we will contact you to opt in or out

[2] Two versions of the revised manuscript: one with either highlights or tracked changes denoting where the text has been changed; the other a clean version (uploaded as the manuscript file).

Important additional instructions are given below your reviewer comments.

Thank you again for your submission to our journal. We hope that our editorial process has been constructive so far, and we welcome your feedback at any time. Please don't hesitate to contact us if you have any questions or comments.

Sincerely,

Christopher J. Tonkin  
Guest Editor  
PLOS Pathogens

Dominique Soldati-Favre  
Section Editor  
PLOS Pathogens

Kasturi Haldar  
Editor-in-Chief  
PLOS Pathogens  
[orcid.org/0000-0001-5065-158X](https://orcid.org/0000-0001-5065-158X)

Michael Malim  
Editor-in-Chief  
PLOS Pathogens  
[orcid.org/0000-0002-7699-2064](https://orcid.org/0000-0002-7699-2064)

[Thank you for the positive comments on the manuscript. Please see our point-by-point responses below.](#)

## **Part I - Summary**

### **Reviewer #1:**

The authors here present new work uncovering the functions of the alveolin proteins of *Toxoplasma gondii*. The authors show that conditional depletion of a novel protein, IMC43, leads to a severe defect in replication, characterised by issues in cell morphology and cell cycle control. Through elegant complementation experiments, they identify a region in the C-terminus of IMC43 required for its function, and that this region mediates interactions between IMC43 and two other IMC proteins, IMC32 and IMC44. The authors go into detail identifying the roles of IMC44 and investigate IMC32, a previously studied protein which they show here relies on IMC43 for correct localisation to daughter cell buds.

This work is very well performed and presented and provides new information about the organisation of daughter cell budding in *Toxoplasma endodyogeny*. The manuscript is of high quality and I believe is suitable for immediate publication. I would like to congratulate the authors on really great work.

### **Reviewer #2:**

The manuscript by Pasquarelli et al. characterizes a novel *T. gondii* IMC protein, IMC43. IMC43 was identified by previous IMC29 BioID experiments carried out in the Bradley lab (PMID: 36622147) and shares localization and dynamics with other markers of the daughter cell scaffold, a structure that represents the earliest daughter bud assembly. Conditional depletion of IMC43 leads to morphological and division defects, with parasites exhibiting severely impaired proliferation. Attempts to disrupt the ORF were unsuccessful indicating that IMC43 is essential. The authors dissect IMC43 function by creating nine deletion mutants and identify a 120 aa long region at the c-terminus necessary for its function. Combining data from IMC43 BioID experiments and an IMC43 Y2H screen, the author shortlist 30 genes and follow up on two, IMC32 and the so far uncharacterized IMC44. Taking advantage of the IMC43 conditional depletion system and the identified loss of function mutant, the authors show that IMC43 is needed for correct localization of IMC32 and 44 in the mid/late budding stage. IMC43's essential function therefore seems to be maintaining daughter bud integrity during endodyogeny.

How daughter buds form and which genes contribute to the process is still not understood in detail, neither in *T. gondii* nor in Apicomplexa in general and this manuscript makes an important contribution by carefully characterizing a novel IMC protein. Overall, this is a nicely carried out study with well-controlled experiments. The presented images allow adequate interpretation of the results and the combination of BioID and Y2H screening exhibits a good strategy toward identifying interacting proteins in the parasite. The specific comments are as follows:

### **Reviewer #3:**

This is a very well executed study that characterizes the *Toxoplasma gondii* protein IMC43. This protein is part of the inner membrane complex of budding cells and is essential for parasite division. *Toxoplasma* divides by a unique mechanism known as endodyogeny and the discovery of proteins essential for the process advances the field significantly. The work presented is a thorough characterization of the localization, function, and interactors of IMC43. The

experiments presented are well executed, controlled for, and carefully interpreted. The data presented is convincing and provides great insight into the scaffold that allows for parasite division. There are no major concerns about the manuscript, only a few minor details that could use clarification.

We thank the three reviewers for their positive summaries of the manuscript.

## Part II – Major Issues: Key Experiments Required for Acceptance

### Reviewer #1:

No new experiments are required

We thank Reviewer 1 for the positive comments on the manuscript.

### Reviewer #2:

1)The authors should consider revising the title of the manuscript, as neither IMC43 nor IMC32 is functionally involved in daughter bud initiation (buds still form when proteins are conditionally depleted, e.g. Fig 1A/C, Fig S8 B/C). Although both proteins localize to the DCS, naming the complex “essential daughter bud initiation complex” may be slightly overreaching.

The reviewer makes a valid point that it is not completely accurate to refer to the IMC43-IMC32 complex as a “daughter bud *initiation* complex” since bud initiation continues in the absence of either protein. Our data demonstrates that loss of IMC43 results in severe morphological defects as well as a variety of replication defects that point to a dysregulation of endodyogeny. Overall, the role of IMC43 (and IMC32) appears to be ensuring the correct *assembly* of the IMC during endodyogeny. We therefore changed the title to the following:

“Identification of IMC43, a novel IMC protein that collaborates with IMC32 to form an essential daughter bud *assembly* complex in *Toxoplasma gondii*”

This change was adopted throughout the text of the manuscript as well.

2) The authors use a fast acting auxin-inducible degron system and show that IMC43 is depleted after 4 hrs of IAA treatment (Fig S3B). However, the phenotypic analyses are done mostly after 24 hrs of IAA treatment, allowing parasites to undergo several rounds of division. Did the authors detect any aberrations in 4 hr IAA treated parasites that would indicate primary defects of IMC43 depletion?

We observed parasites after 24 hours of IAA treatment to see how prolonged loss of IMC43 affects the parasites. We find that the defects caused by depletion of daughter IMC proteins such as IMC43, IMC32, and IMC29 tend to accumulate over time as the parasites undergo consecutive replication cycles in the absence of these critical proteins. It is unlikely that 4 hours of IAA treatment would be enough to observe these defects in endodyogeny. Therefore, we feel that 24 hours is more appropriate for examining the phenotype of IMC43-depleted parasites.

To clarify this in the manuscript, we altered the text to state:

“To assess the effects of IMC43 knockdown on parasite morphology *over the course of multiple replication cycles*, parasites were treated with IAA for 24 hours and assessed by IFA” (line 155)

3) Upon IMC43AID depletion IMC32 loses its striped pattern on daughter buds (Fig 7D/E). Have the author tested the impact of IMC43 depletion on other proteins (e.g. suture proteins ISCs and TSCs [PMID 27696623]) that have been reported to localize to similar striped patterns in daughter/mature parasites ?

We have not examined these as there are quite a lot of these proteins. This will be something to examine in future studies.

**Reviewer #3:**

None noted

We thank Reviewer 3 for the positive comments on the manuscript.

**Part III – Minor Issues: Editorial and Data Presentation Modifications**

**Reviewer #1:**

No minor points

**Reviewer #2:**

The authors use state of the art microscopy that clearly allows result interpretation. However, given the small size of certain parasite structures that are difficult to resolve with conventional light microscopy, have the authors considered applying super-resolution microscopy (e.g. 3D-SIM)?

This will most likely facilitate better resolution of the earliest IMC43 appearances (Fig 1G/J),

where the signal seems to concentrate in distinct foci before decorating the forming daughter bud. Super-resolution imaging would further allow mapping the spatial relations of DCS constituents during bud initiation (specifically the IMC32/IMC43 relation).

We agree that these studies are a good idea, but we feel they are beyond the scope of this paper.

- The IMC43  $\Delta$ 1441-1561 deletion mutant still localizes to daughter buds although it fails to rescue the phenotype caused by IMC43AID depletion. Have the authors considered tagging the  $\Delta$ 1441-1561 deletion mutant with TurboID and create a BioID experiment after IMC43AID depletion? This would likely expand the list of candidates that rely on IMC43 for association with daughter buds when compared to IMC43wt BioID.

This is a good idea and we will consider trying this for future studies.

- In the IMC43AID-depleted background, does IMC44 already localize to the basal complex at bud initiation and the early budding stages, or is basal complex association timing preserved in absence of IMC43? Images provided in Fig 6E seem to correspond to the mid budding stage and do not allow this assessment.

As best we can tell, IMC44 does appear to always be in the basal complex upon IMC43 knockdown. This was difficult to image appropriately in the earliest daughter buds thus we feel the images we provided are more appropriate for assessing the phenotype.

Edits:

-line 52: change Apicomplexans to Apicomplexa

Changed as suggested.

-lines 65-67: Apicomplexa use external or internal budding strategies, which should be either reflected in the sentence or "internal" be deleted.

Changed as suggested.

-line 79: see above comment, I suggest deleting "internal" from this sentence and move it to the next one (lines 80-82)

Changed as suggested.

-line 452: "HXGPRT" is used as abbreviation for hypoxanthine-xanthine-guanine phosphoribosyltransferase while lines 472-474 use "HPT", this should be made uniform.

All instances of "HPT" were changed to "HXGPRT" as suggested.

-Fig 1G: Three of the four mature parasites seem to form only a single daughter, is that correct?

In this image, the daughter buds within each parasite were not in the same plane as each other, so it appears as if they are missing. Since this may be confusing for the reader, we replaced this image with a new one.

-line 653; Change "Asterisk indicates daughter apical caps." to "Asterisk indicates daughter buds", as the asterisk does not seem to clearly point to the apical cap of the daughter.

Changed as suggested.

-line 685: Please fix cross-reference for plaque assays, legends says "J" but plaque assays are shown as panel "H" of Figure 2.

This mistake was corrected.

-line 688: Same as above, please correct to panel "H".

This mistake was corrected.

-line 691: Delete the second scale bar sentence.

This mistake was corrected.

-Fig 3: Please add IAA treatment time to figure legend and/or corresponding result section.

This information was added to the figure along the right-hand side of each panel.

-Fig 3: Please indicate scale bar size in the figure or legend.

The figure legend was updated to include scale bar size.

-Fig 3D: The - IAA “merge” image also shows the Hoechst signal in Blue, please add the corresponding Hoechst signal for the +IAA treated “merge” images as well.

Thank you for pointing out this mistake. We did not intend to include the Hoechst staining for this image as it is not necessary for assessment of the daughter bud subpellicular microtubules. Therefore, we removed the blue channel from the -IAA merge image.

-Fig 3E: This reviewer feels that the message of continues nuclear division would be stronger if Hoechst signal is also shown for images in Fig 2E, taking advantage of the longer 40 hr IAA treatment time.

We agree and have added a new image showing the centrosome and nuclei at 40 hours (see new Fig 3F).

-Fig 5D/Table S1: The table in the figure and the Supp. Table 1 show candidate abundance as spectral counts, while the methods (line 600) state that “candidates were ranked by normalized spectral abundance factor values.....”. This should be made uniform or alternatively, provide normalized spectral abundance factor values in Table S1.

We corrected this mistake in the methods section.

-Fig 5D: Since the authors reference the PPKL preprint in the discussion (lines 427-428), please add a reference in the “Localization” column of the figure as well.

Changed as suggested.

-Figure S2: A schematic showing where IMC43 gRNA binds and CRISPR/Cas9 double strand break occurs will enhance understanding of this figure. Please also add dimension of the scale bar to the figure or the legend.

We added an additional panel depicting the CRISPR/Cas9 system targeting the TGGT1\_238895 locus as suggested. We also updated the figure legend and included the dimension of the scale bar.



-Figure S3: Please label western blots molecular weight with “kDa”

Changed as suggested.

**Reviewer #3:**

It is interesting that the IMC43 kd results in defects in the cytoskeleton of the mother parasite. Since IMC43 is exclusively in the daughter buds this is interesting and might warrant some discussion or speculation.

The fact that IMC43-depleted parasites exhibit severe morphological defects in the cytoskeleton of mature parasites indicates that IMC43 plays a critical role in the initial construction of the IMC during endodyogeny. Without this foundational player, the IMC of daughter buds forms improperly, leading to irreparable defects in the cytoskeleton that persist in matured parasites.

There might be a need for some clarity in line 216 where it says ‘the fusion protein is active’. Given the data presented I imagine this means that the TurboID part of the fusion is active (i.e it biotinylates). Did they test the fusion in the KD strain to know that it rescues the phenotype? That would be needed to be able to say that the IMC43 part of the fusion is active. This is not needed, but some clarity about what it is meant by the ‘fusion protein is active’ might be helpful.

We edited the text in the portion of the manuscript to clarify this. As suggested by the reviewer, we intended to say that the TurboID biotin ligase portion of the IMC43<sup>TurboID</sup> fusion protein is enzymatically active and able to biotinylate proximal proteins.
